# Supplementary material for: Changes in gut microbiota composition after 12 weeks of a home-based lifestyle intervention in breast cancer survivors during the COVID-19 lockdown
Source: PubMed Central journal article supplement (PMC10505708; doi:10.3389/fonc.2023.1225645), 2023-09-01
Supplement: Image_1.pdf [file Image_1.pdf]

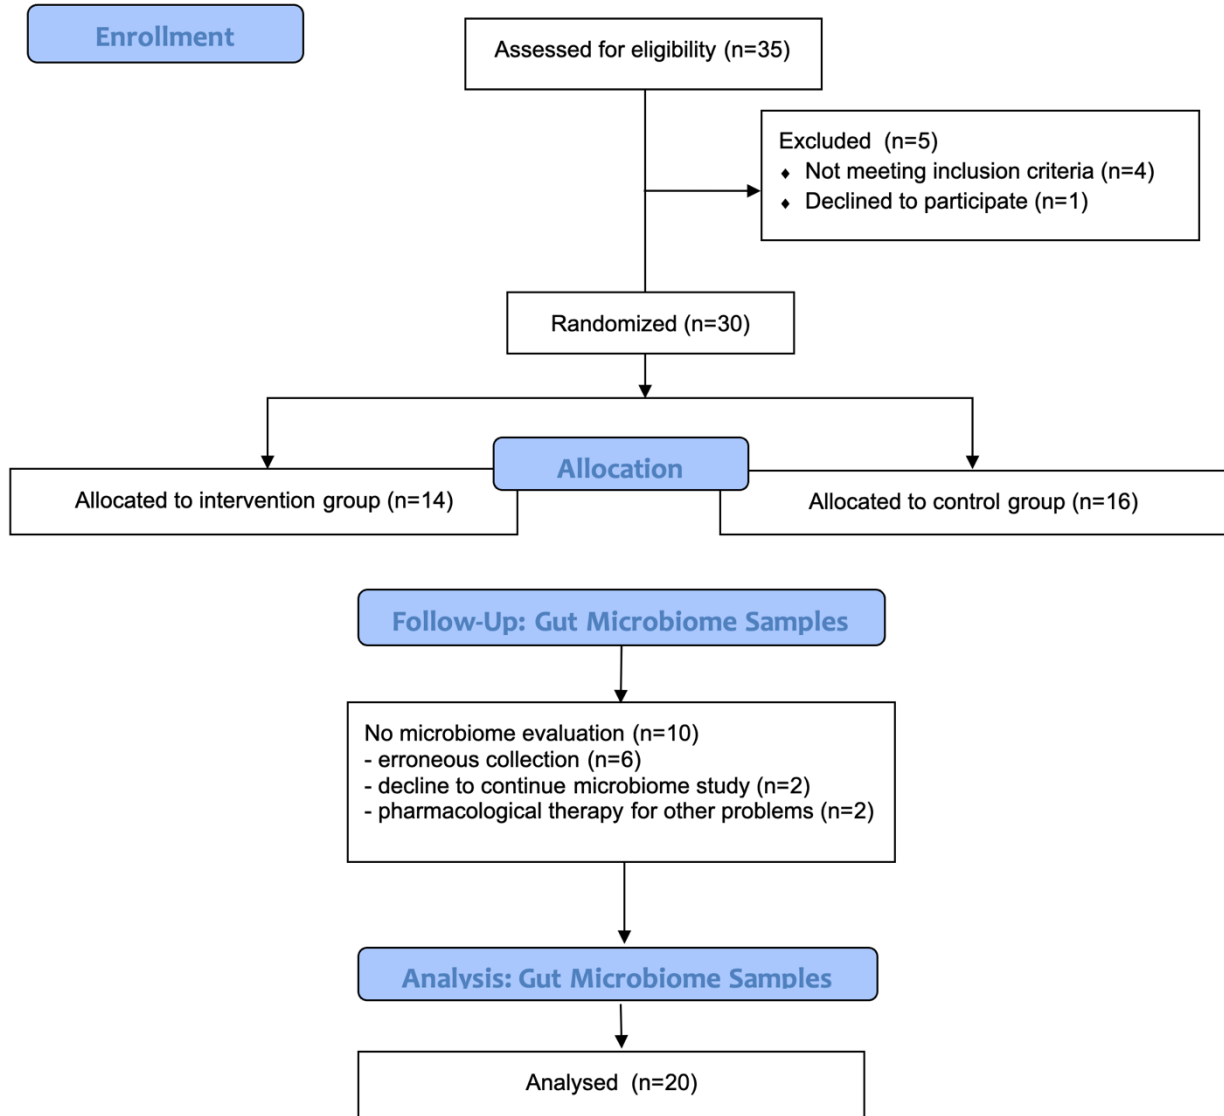

**Supplementary Figure 1.** CONSORT 2010 Flow Diagram.
